# Supplementary material for: Potential for Cell-Mediated Immune Responses in Mouse Models of Pelizaeus-Merzbacher Disease
Source: PubMed Central journal article supplement (PMC3932547; doi:10.3390/brainsci3041417), 2013-09-30
Supplement: NIHMS554476-supplement-supplement_1.pdf [file NIHMS554476-supplement-supplement_1.pdf]

995 **Supplemental Figure 1** – processing and normalization of the microarray data for P16 *rsh* and *msd*  
 996 mice

997 (A) Example of a raw log – log correlation plot showing gene expression levels from the  
 998 Pooled Reference standard versus the data from microarray #1. (B) Transformation of the  
 999 plot in (A) to correct for nonlinearities in the microarray analysis. (C) Summary of log  
 1000 transformation for all microarray data used in this study. (D) Averaging of biological  
 1001 replicate samples with respect to genotype.

1002

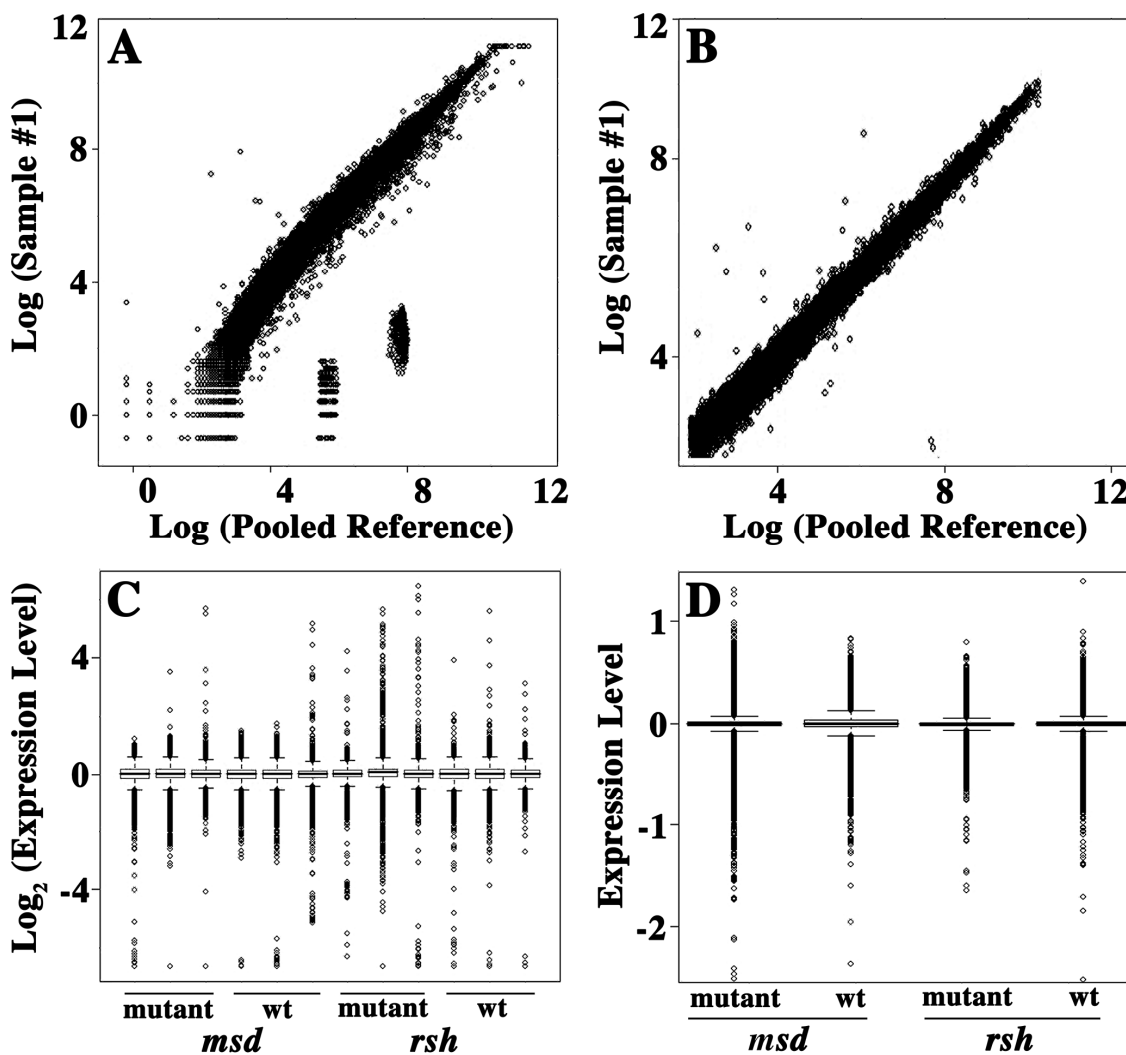

1003
